# Supplementary material for: Breast Reconstruction Use and Impact on Surgical and Oncologic Outcomes Amongst Inflammatory Breast Cancer Patients—A Systematic Review
Source: MDPI journal article supplement (doi:10.3390/curroncol30070489), 2023-07-13
Supplement: s1 [file s1]

## SUPPLEMENTARY MATERIALS

**Table S1:** Search Strategy

| MEDLINE                                                                                                                                                                                                                                                                                                                                                                                                                                                                                                                                                                                                                                                                                                                                                                                    | EMBASE                                                                                                                                                                                                                                                                                                                                                                                                                                                                                                                                                                                                                                                                                                                                                                                     | Cochrane Library                                                                                                                                                                                                                                                                                                                                                                                                                                                                                                                         |
|--------------------------------------------------------------------------------------------------------------------------------------------------------------------------------------------------------------------------------------------------------------------------------------------------------------------------------------------------------------------------------------------------------------------------------------------------------------------------------------------------------------------------------------------------------------------------------------------------------------------------------------------------------------------------------------------------------------------------------------------------------------------------------------------|--------------------------------------------------------------------------------------------------------------------------------------------------------------------------------------------------------------------------------------------------------------------------------------------------------------------------------------------------------------------------------------------------------------------------------------------------------------------------------------------------------------------------------------------------------------------------------------------------------------------------------------------------------------------------------------------------------------------------------------------------------------------------------------------|------------------------------------------------------------------------------------------------------------------------------------------------------------------------------------------------------------------------------------------------------------------------------------------------------------------------------------------------------------------------------------------------------------------------------------------------------------------------------------------------------------------------------------------|
| <ol style="list-style-type: none"> <li>1. inflammatory<sup>[SEP]</sup></li> <li>2. breast cancer<sup>[SEP]</sup></li> <li>3. (breast neoplasm or breast neoplasms or breast malignancy or breast malignancies).mp. <sup>[L]</sup><sup>[SEP]</sup></li> <li>4. 2 or 3 <sup>[L]</sup><sup>[SEP]</sup></li> <li>5. 1 and 4 <sup>[L]</sup><sup>[SEP]</sup></li> <li>6. breast reconstruction <sup>[L]</sup><sup>[SEP]</sup></li> <li>7. (mammoplasty or mammaplasty or mammoplasties or mammaplasties).mp. <sup>[L]</sup><sup>[SEP]</sup></li> <li>8. (esthetic surgery or esthetic surgeries or esthetic procedure or esthetic procedures or cosmetic surgery or cosmetic surgeries or cosmetic procedure or cosmetic procedures).mp.</li> <li>9. 6 or 7 or 8</li> <li>10. 5 and 9</li> </ol> | <ol style="list-style-type: none"> <li>1. inflammatory<sup>[SEP]</sup></li> <li>2. breast cancer<sup>[SEP]</sup></li> <li>3. (breast neoplasm or breast neoplasms or breast malignancy or breast malignancies).mp. <sup>[L]</sup><sup>[SEP]</sup></li> <li>4. 2 or 3 <sup>[L]</sup><sup>[SEP]</sup></li> <li>5. 1 and 4 <sup>[L]</sup><sup>[SEP]</sup></li> <li>6. breast reconstruction <sup>[L]</sup><sup>[SEP]</sup></li> <li>7. (mammoplasty or mammaplasty or mammoplasties or mammaplasties).mp. <sup>[L]</sup><sup>[SEP]</sup></li> <li>8. (esthetic surgery or esthetic surgeries or esthetic procedure or esthetic procedures or cosmetic surgery or cosmetic surgeries or cosmetic procedure or cosmetic procedures).mp.</li> <li>9. 6 or 7 or 8</li> <li>10. 5 and 9</li> </ol> | <ol style="list-style-type: none"> <li>1. MeSH descriptor:<br/>[Inflammatory Breast Neoplasms] explode all trees</li> <li>2. MeSH descriptor:<br/>[Mammaplasty] explode all trees</li> <li>3. #1 and #2</li> <li>4. Inflammatory breast cancer</li> <li>5. Inflammatory breast neoplasm</li> <li>6. Inflammatory breast malignancy</li> <li>7. IBC</li> <li>8. #4 or #5 or #6 or #7</li> <li>9. Breast reconstruction</li> <li>10. Mammoplasty</li> <li>11. Mammaplasty</li> <li>12. #9 or #10 or #11</li> <li>13. #8 and #12</li> </ol> |
